# Supplementary material for: Mono- and di-ferrocene conjugated 5-methyl benzimidazole based multi-channel receptors for cations/anions with their antimicrobial and anticancer studies
Source: Royal Society of Chemistry journal article supplement (doi:10.1039/d2nj05960f), 2023-01-01
Supplement: d2nj05960f1.pdf [file d2nj05960f1.pdf]

## Mono- and di-ferrocene conjugated 5-methyl benzimidazole based Multi-channel Receptor for Cation/Anion with their Antimicrobial and Anticancer studies

Kavitha Nedunchezian <sup>a</sup> and Sengottuvelan Nallathambi <sup>b\*</sup>

<sup>a</sup> Department of Industrial Chemistry, Alagappa University, Karaikudi 630003, India

<sup>b</sup> Directorate of Distance Education, Alagappa University, Karaikudi 630003, India

<sup>c</sup> Email: svelann@alagappauniversity.ac.in

### Supporting information

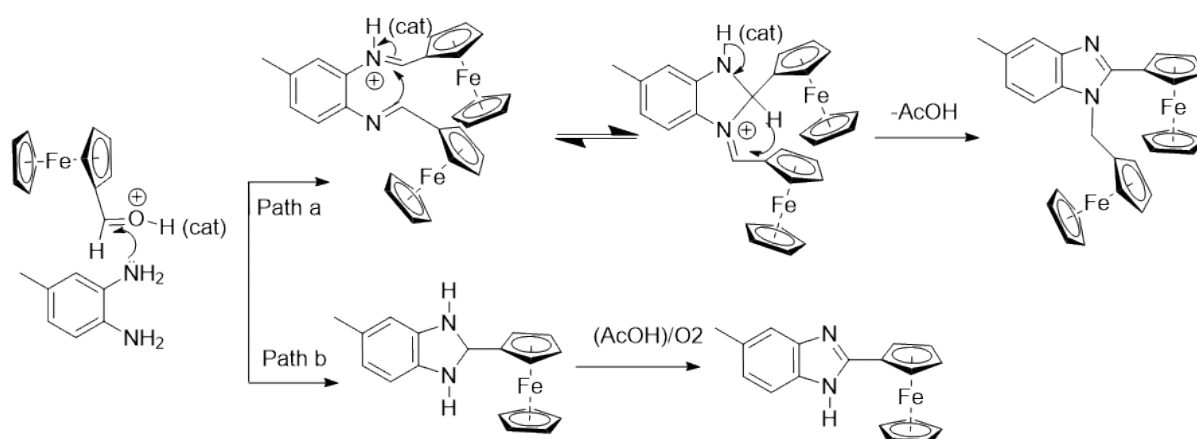

**Fig. S1** A plausible mechanism for the synthetic route for the formation of receptors **1** and **2**, where nitrobenzene acts as the solvent and acetic acid (AcOH) the as catalyst.

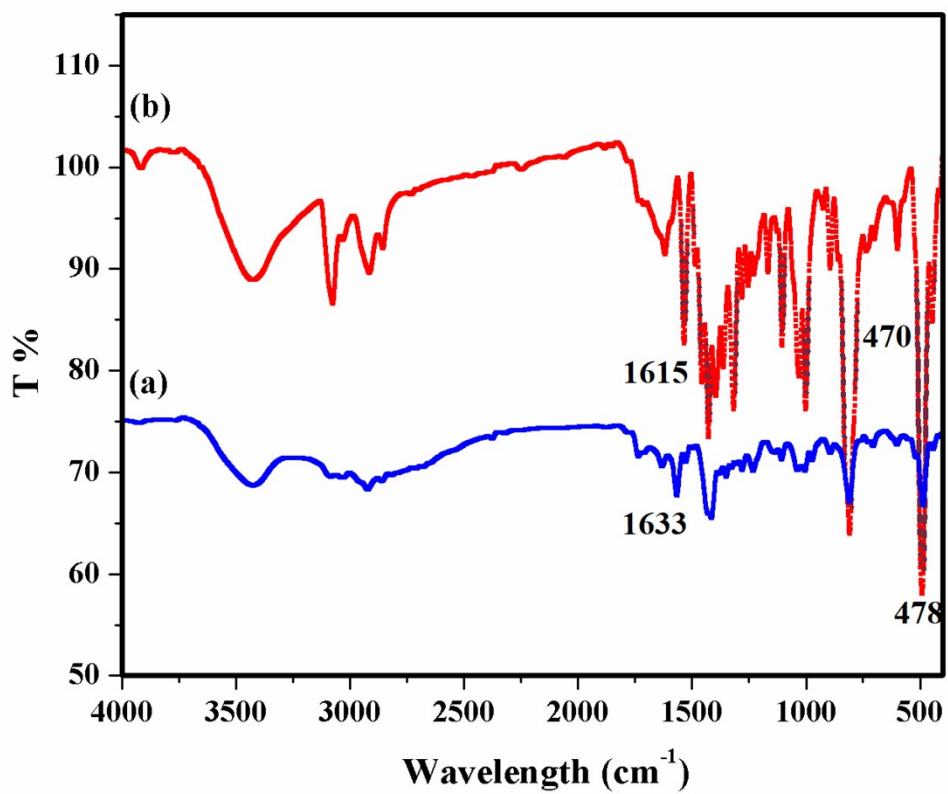

Fig. S2 FT-IR spectra he receptor 1 (a) and receptor 2 (b)

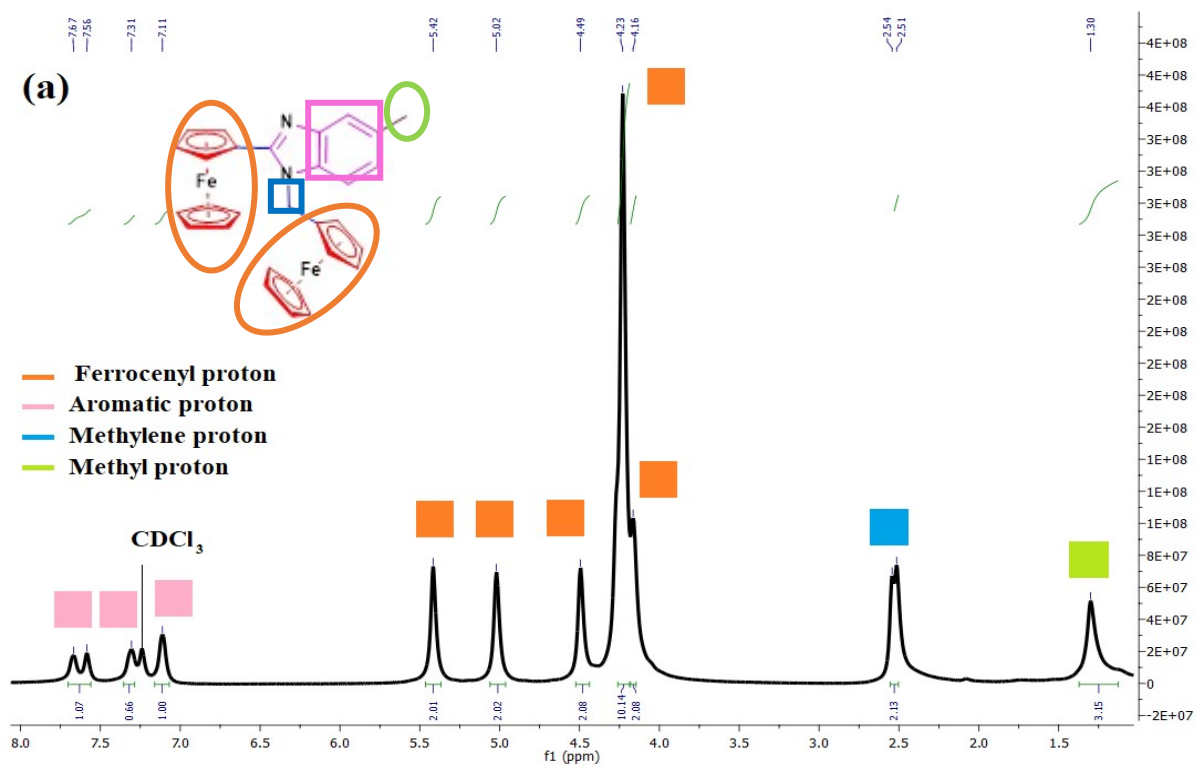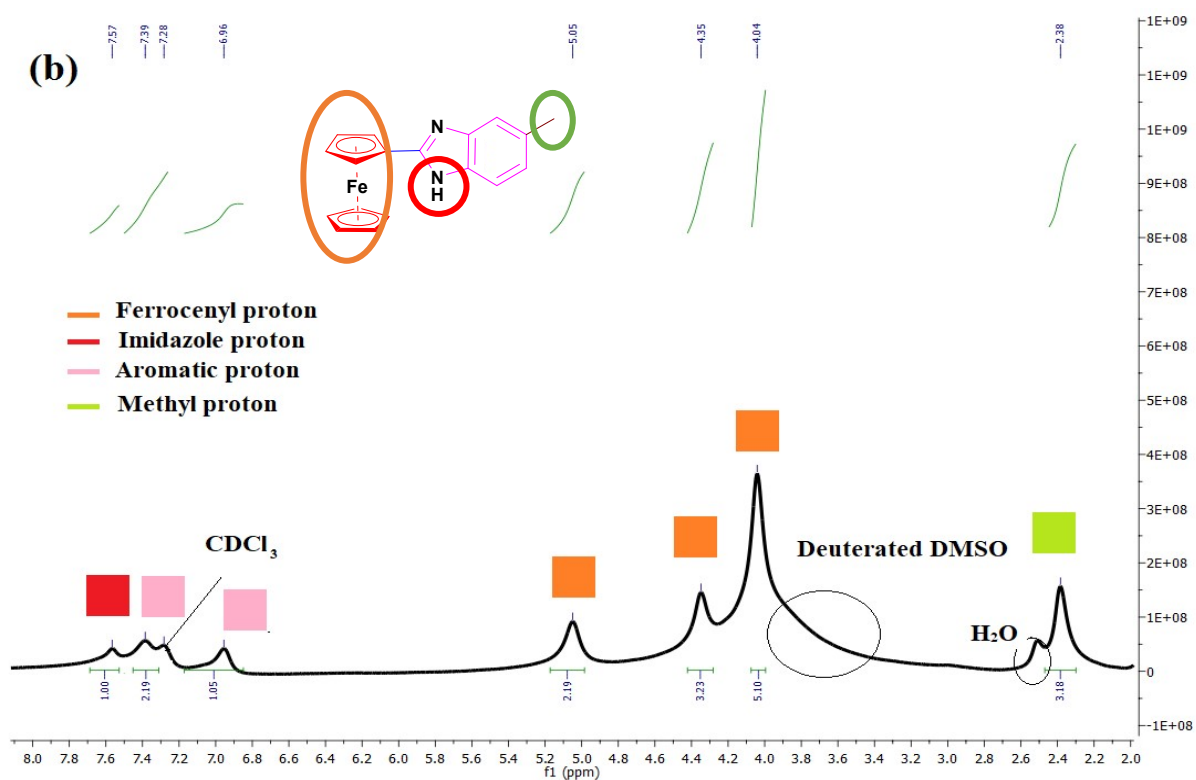

Fig. S3  $^1\text{H}$  NMR spectra for the (a) receptor 1 and (b) receptor 2

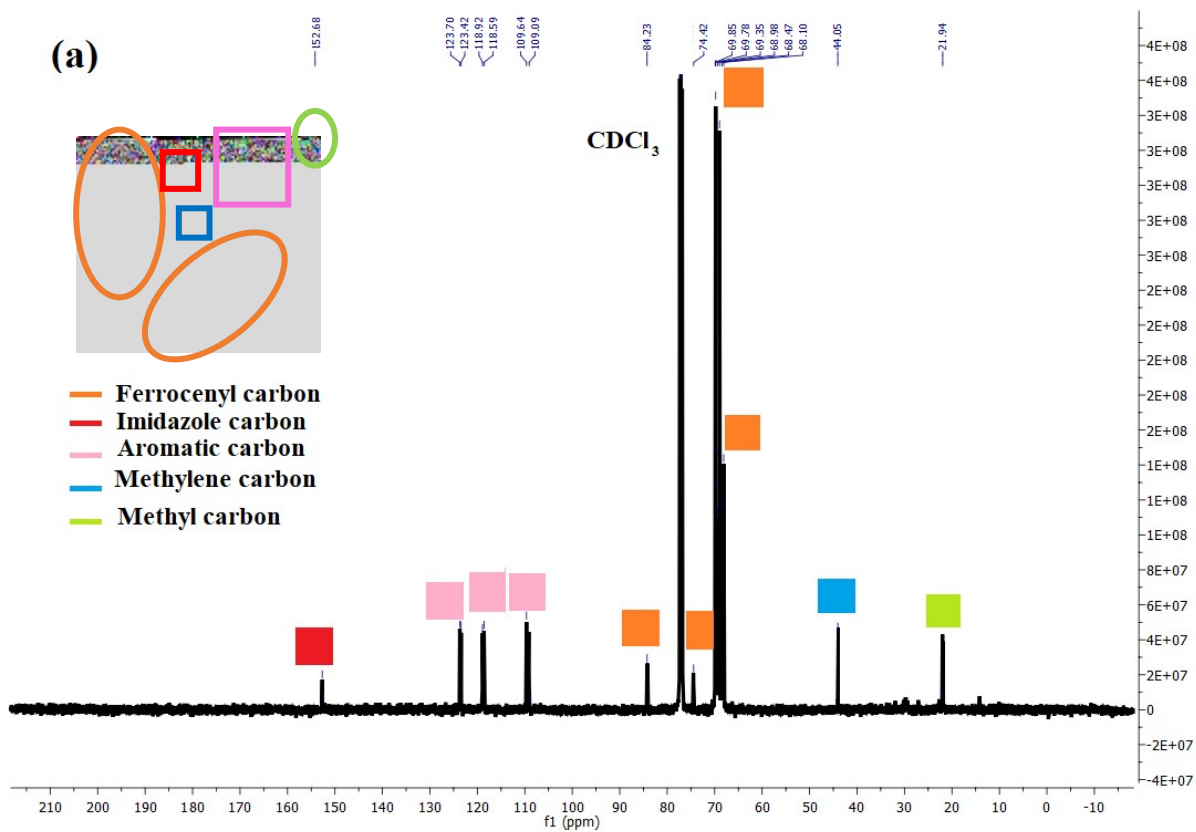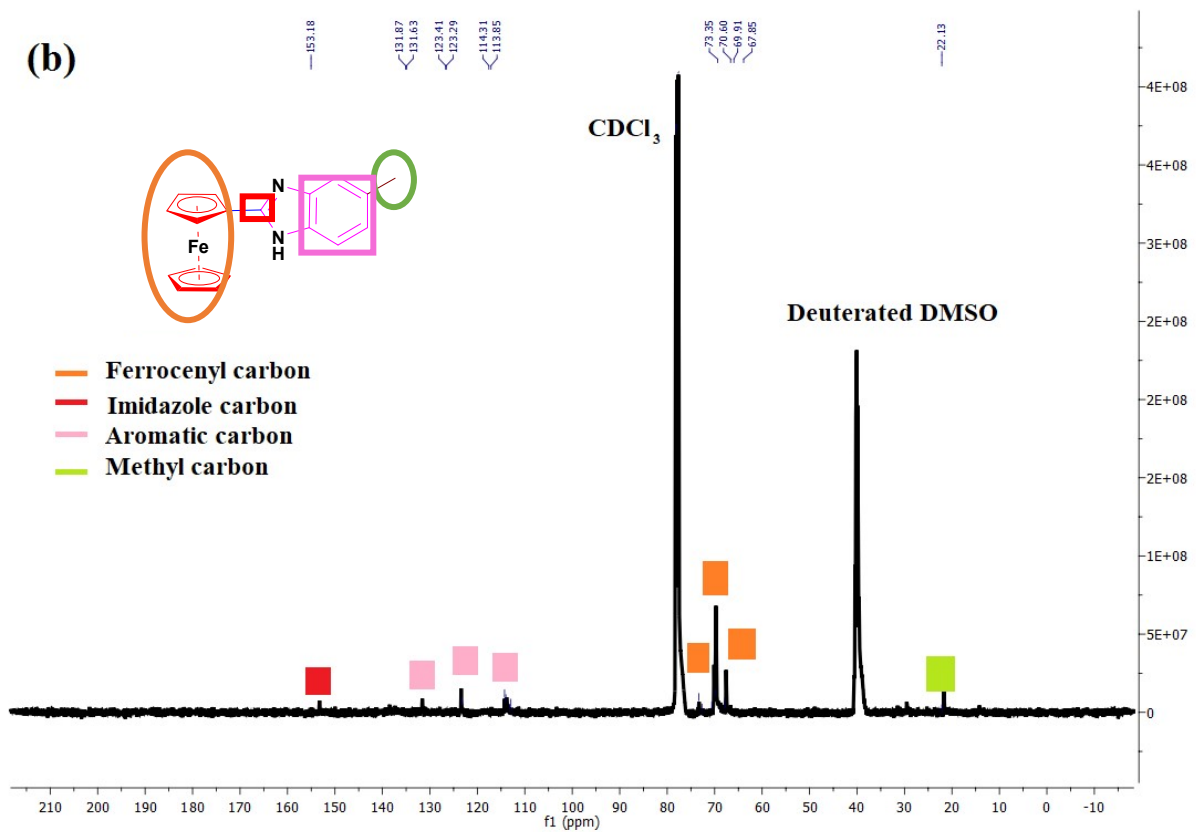

Fig. S4  $^{13}\text{C}$  NMR spectra (a) receptor and (b) receptor 2

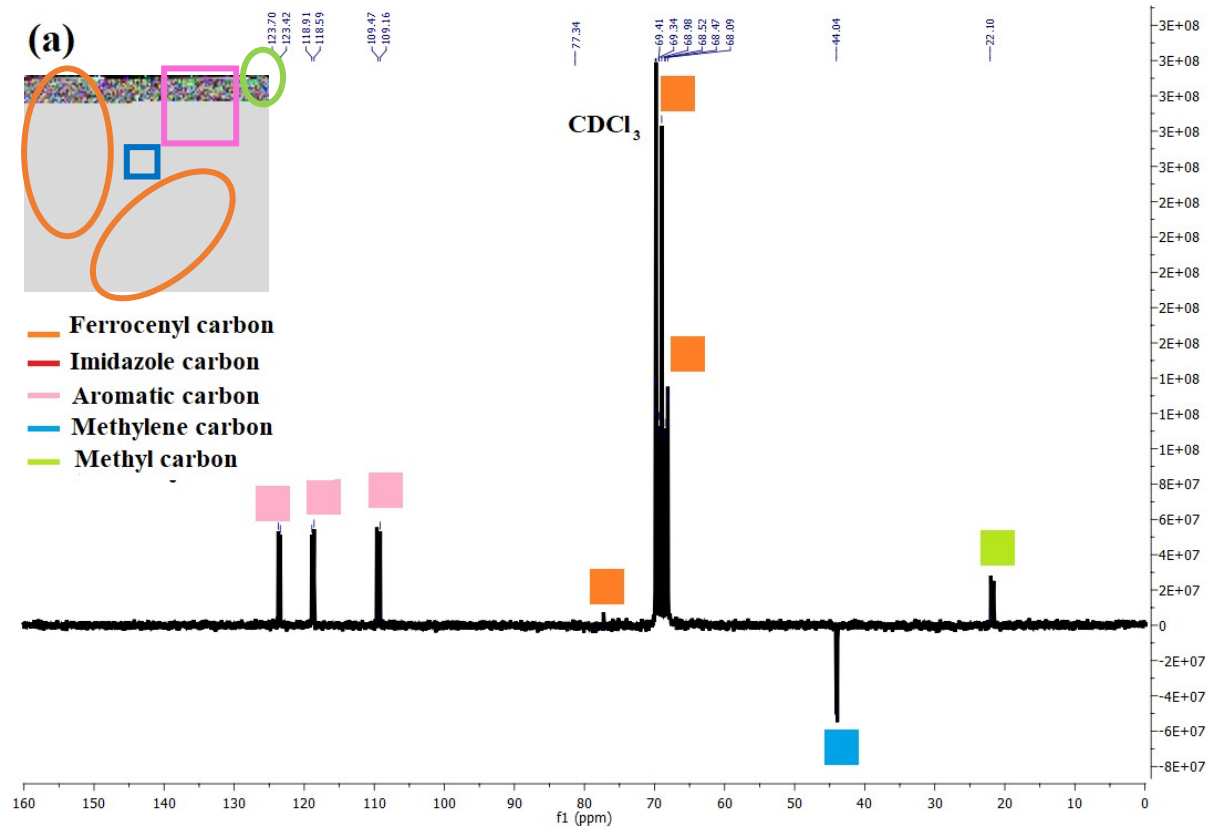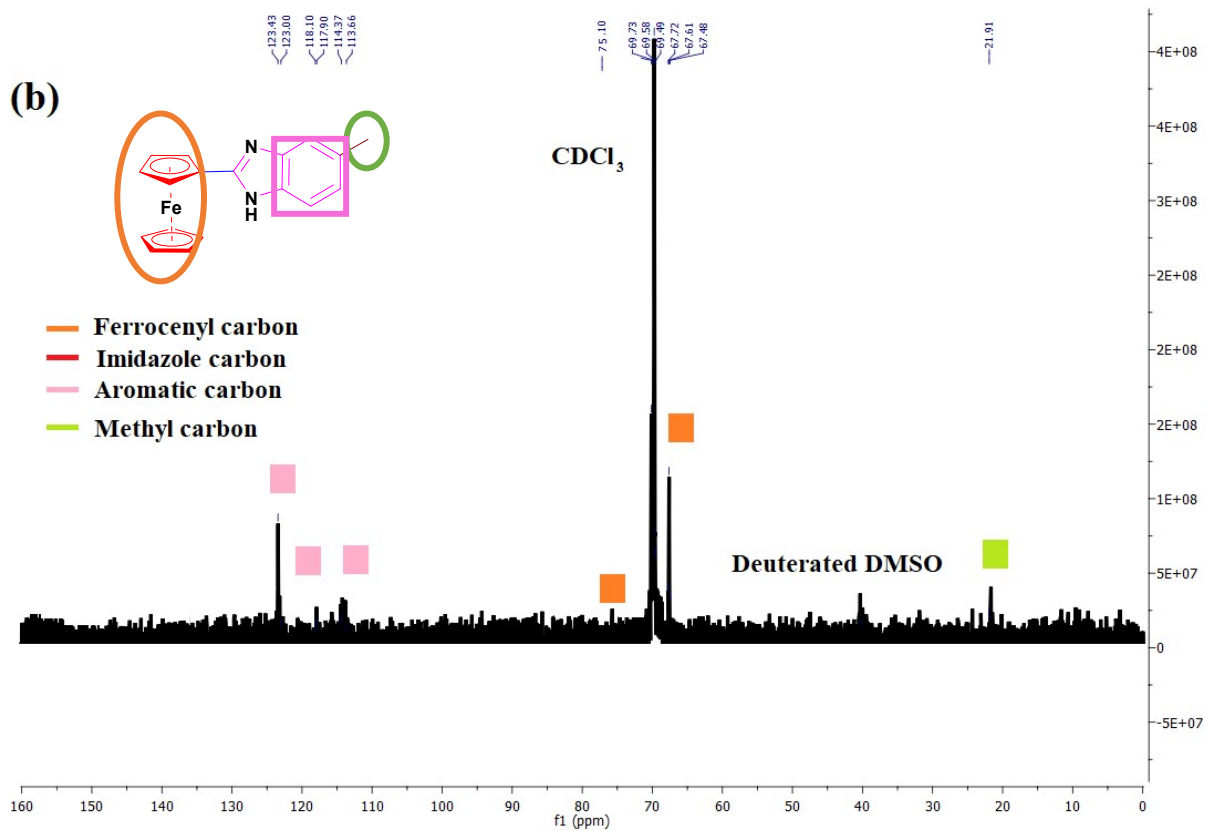

**Fig. S5** DEPT 135 NMR spectra **(a)** receptor and **(b)** receptor 2

**Acquisition Parameter**

|             |            |                       |           |                  |           |
|-------------|------------|-----------------------|-----------|------------------|-----------|
| Source Type | ESI        | Ion Polarity          | Positive  | Set Nebulizer    | 0.4 Bar   |
| Focus       | Not active | Set Capillary         | 4600 V    | Set Dry Heater   | 180 °C    |
| Scan Begin  | 50 m/z     | Set End Plate Offset  | -500 V    | Set Dry Gas      | 4.0 l/min |
| Scan End    | 3000 m/z   | Set Collision Cell RF | 100.0 Vpp | Set Divert Valve | Waste     |

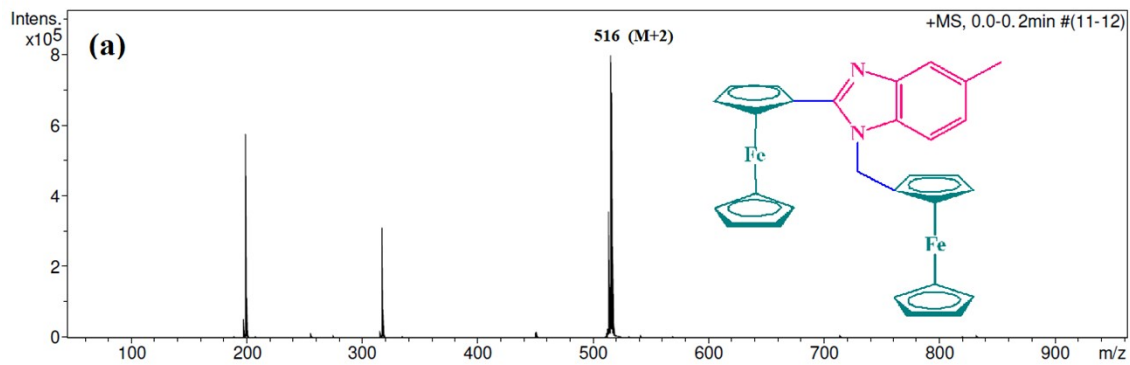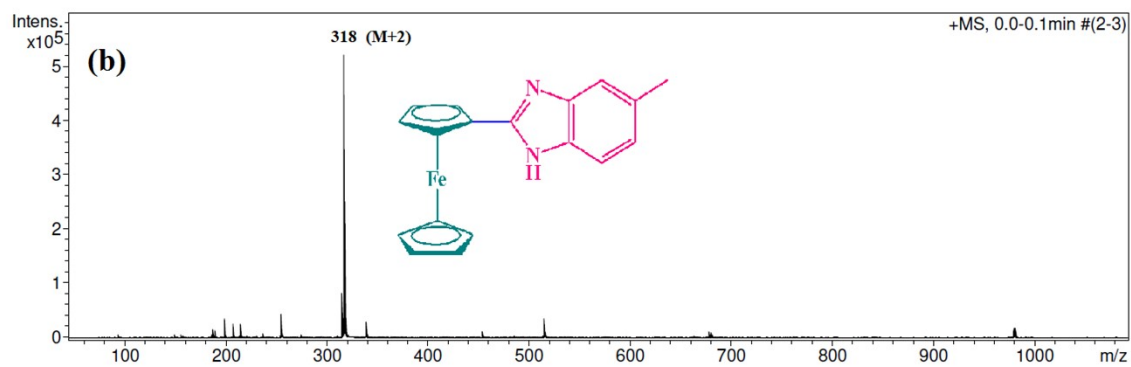

**Fig. S6** ESI mass spectra for the receptor 1 (a) and receptor 2 (b)

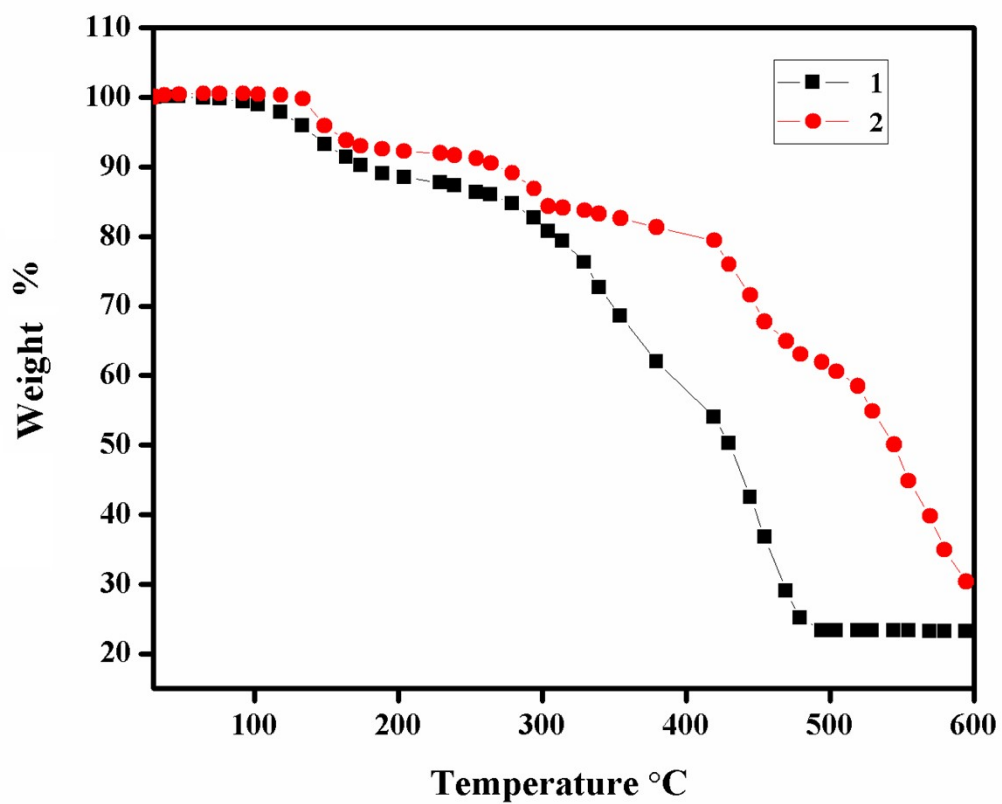

**Fig. S7** Thermogram of receptors **1** (black) and **2**(red)

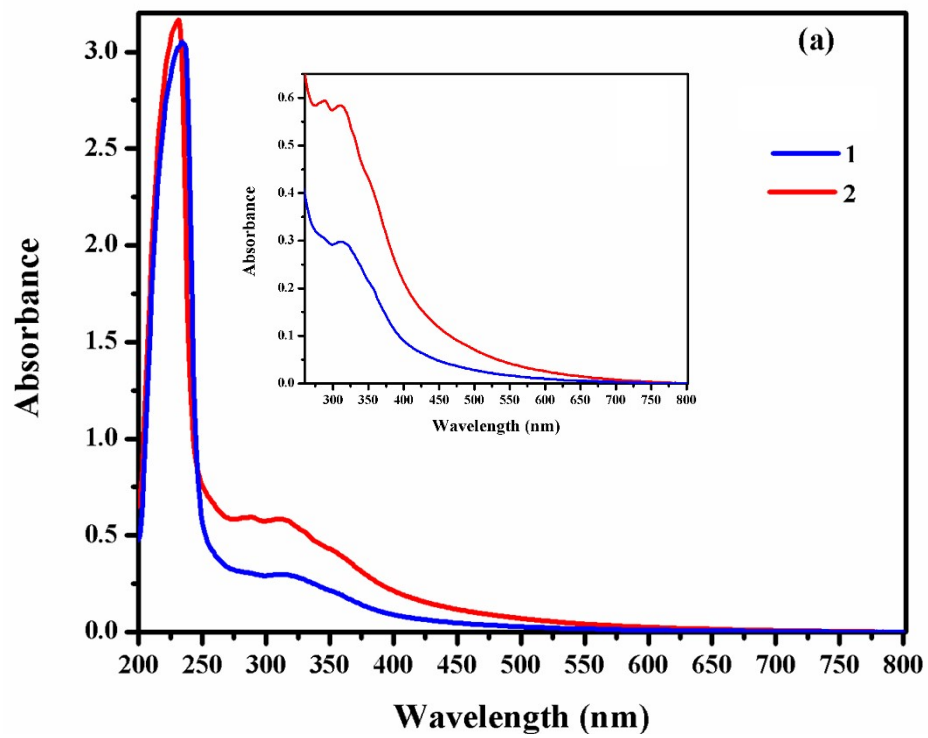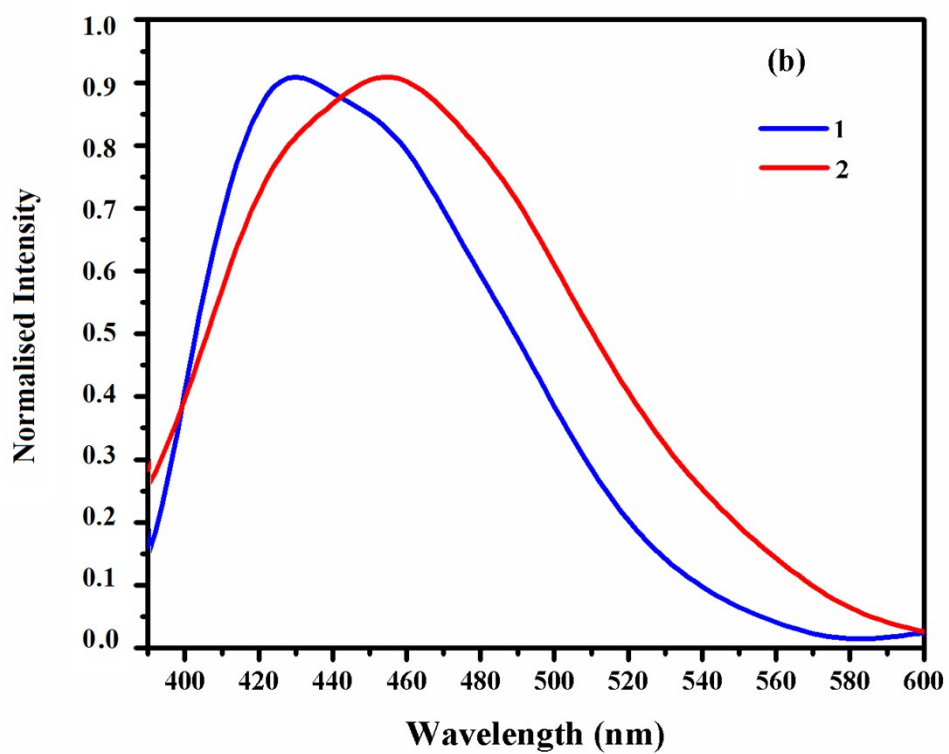

**Fig. S8** (a) UV-visible spectroscopy (b) Fluorescence spectroscopy for receptor 1 and 2 ( $c=10^{-5}$  M)



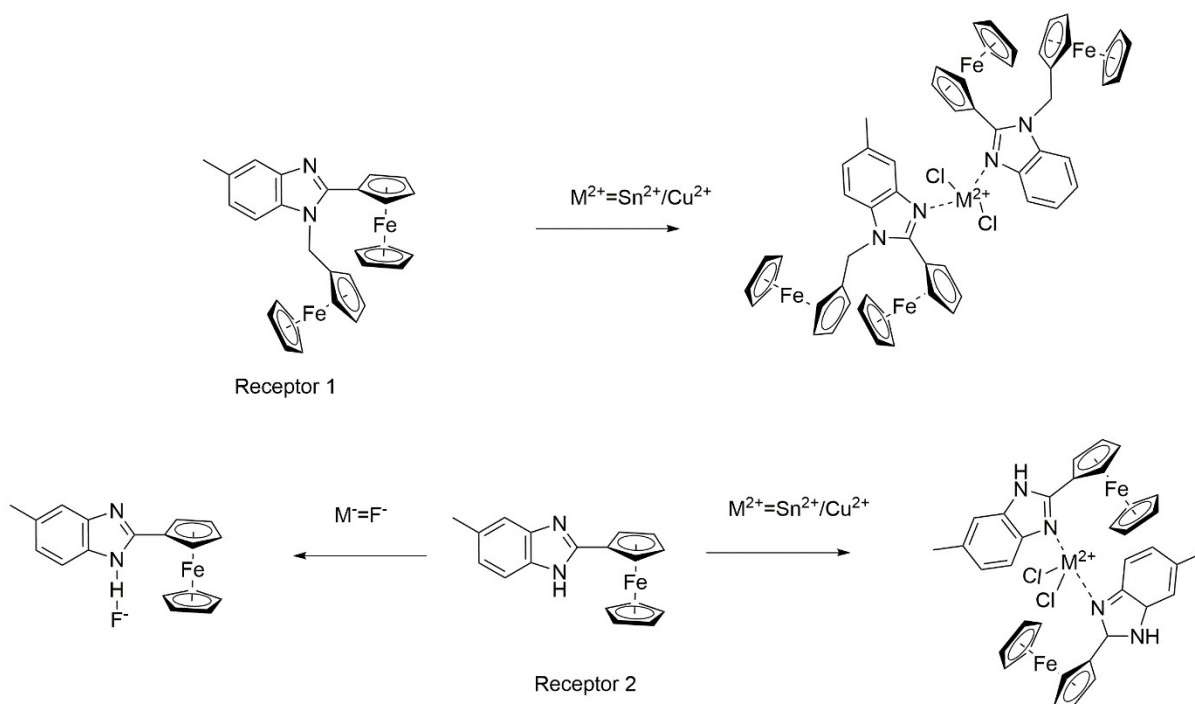

**Fig. S9** Structural aspect for the formation of  $M^{2+}$  with receptors **1**  $M^{2+}/M^-$  with receptor **2**

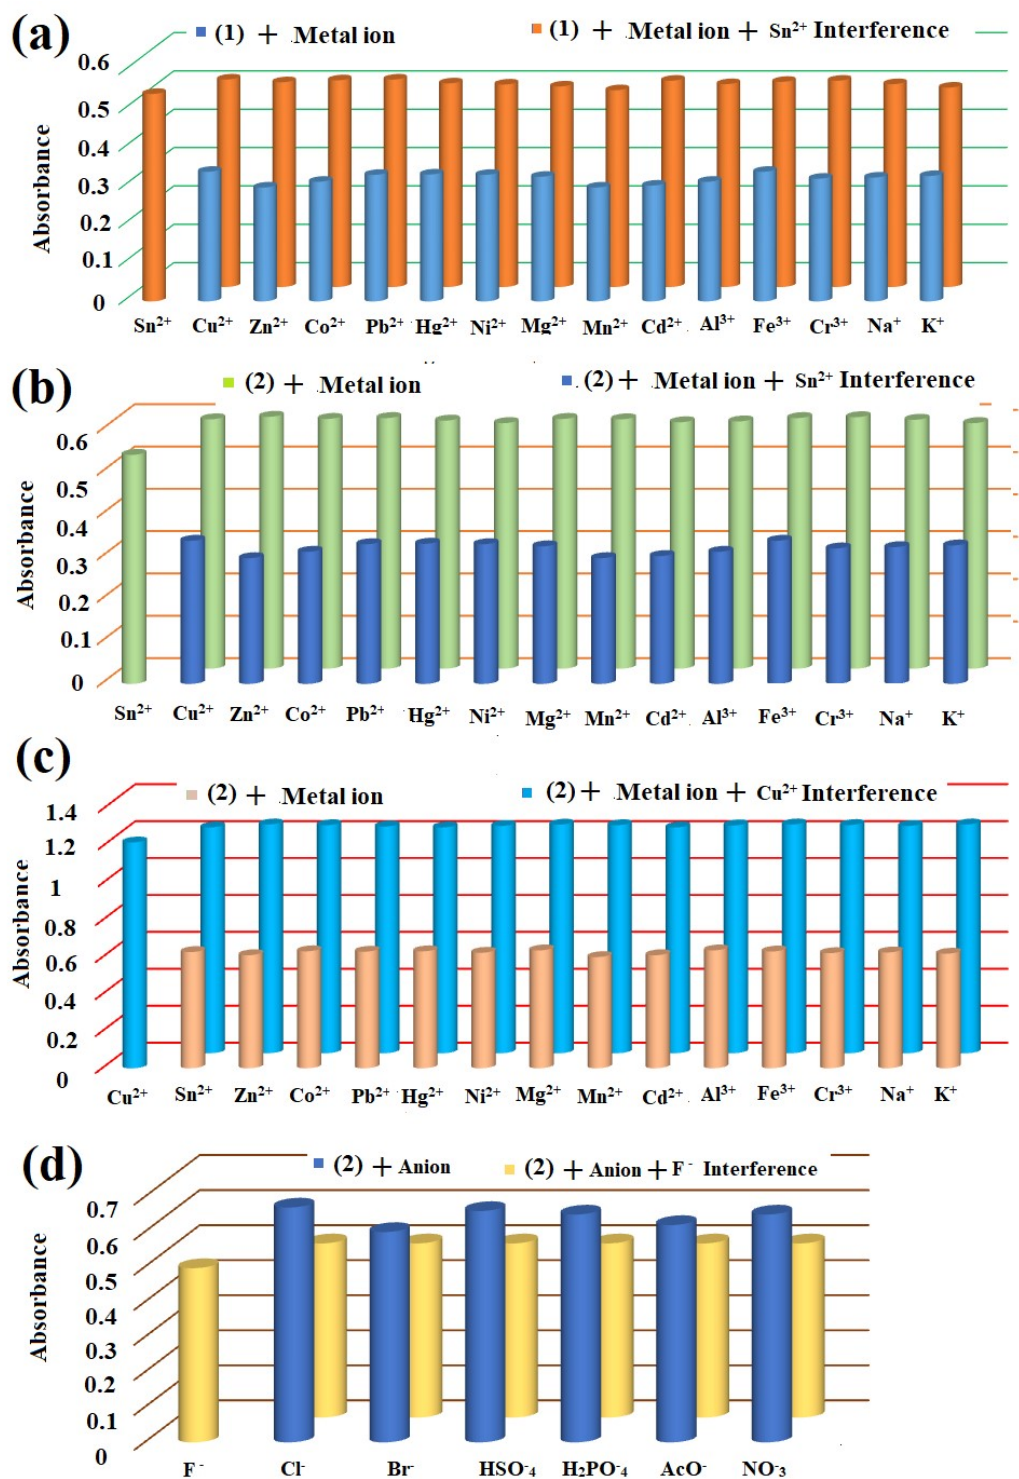

**Fig. S10** (a) Interference studies (a) receptor 1 with Sn<sup>2+</sup> at 358 nm (b) receptor 2 with Sn<sup>2+</sup> at 356 nm (c) receptor 2 with Cu<sup>2+</sup> at 310 nm (d) receptor 2 with F<sup>-</sup> at 275 nm with various ions ( $c=10^{-5}$  M)

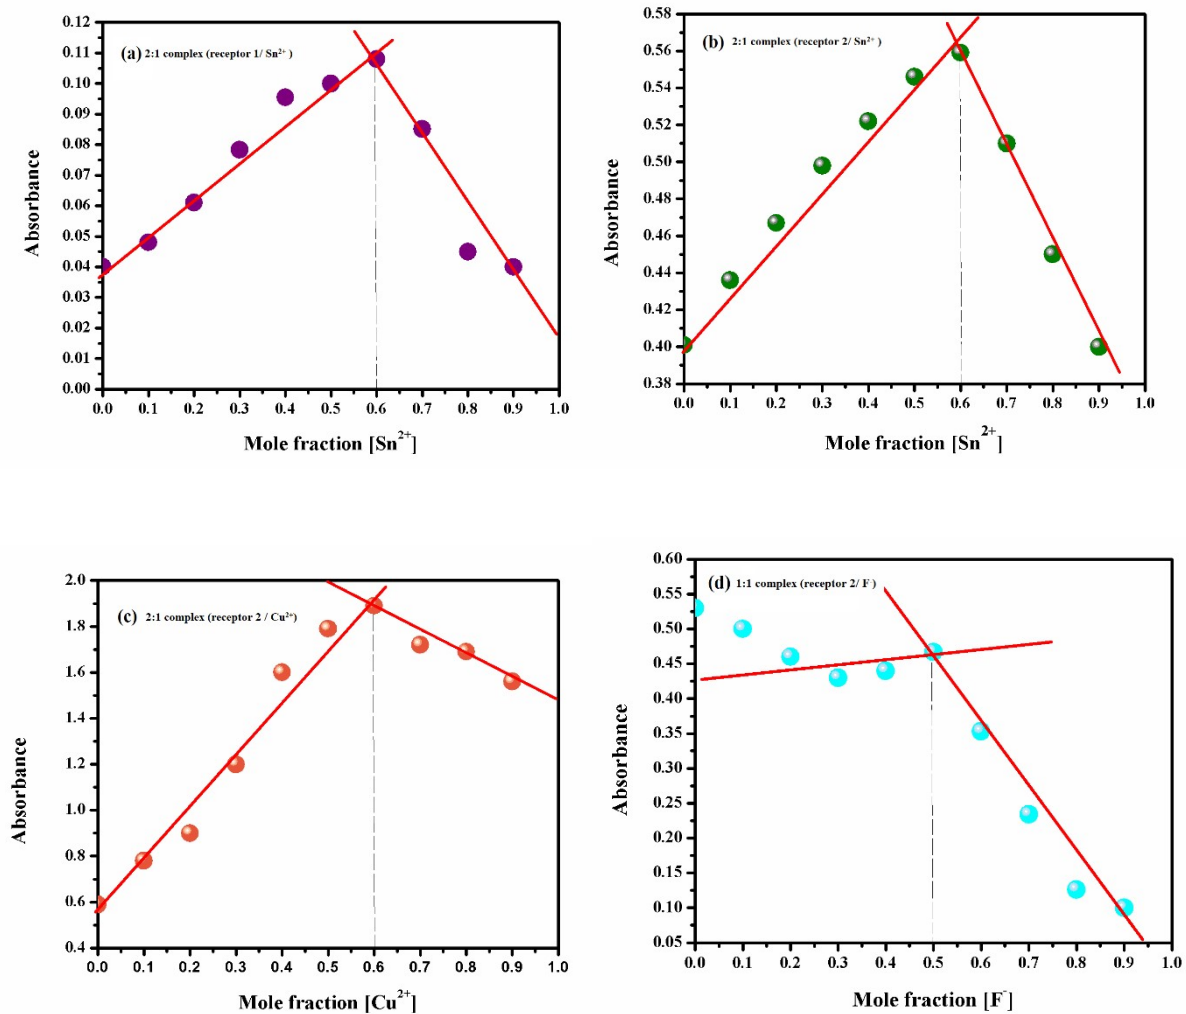

**Fig. S11** Jobs plot for **(a)** receptor **1** with Sn<sup>2+</sup> at 358 nm **(b)** receptor **2** with Sn<sup>2+</sup> at 356 nm **(c)** receptor **2** with Cu<sup>2+</sup> at 310 nm **(d)** receptor **2** with F<sup>-</sup> at 275 nm

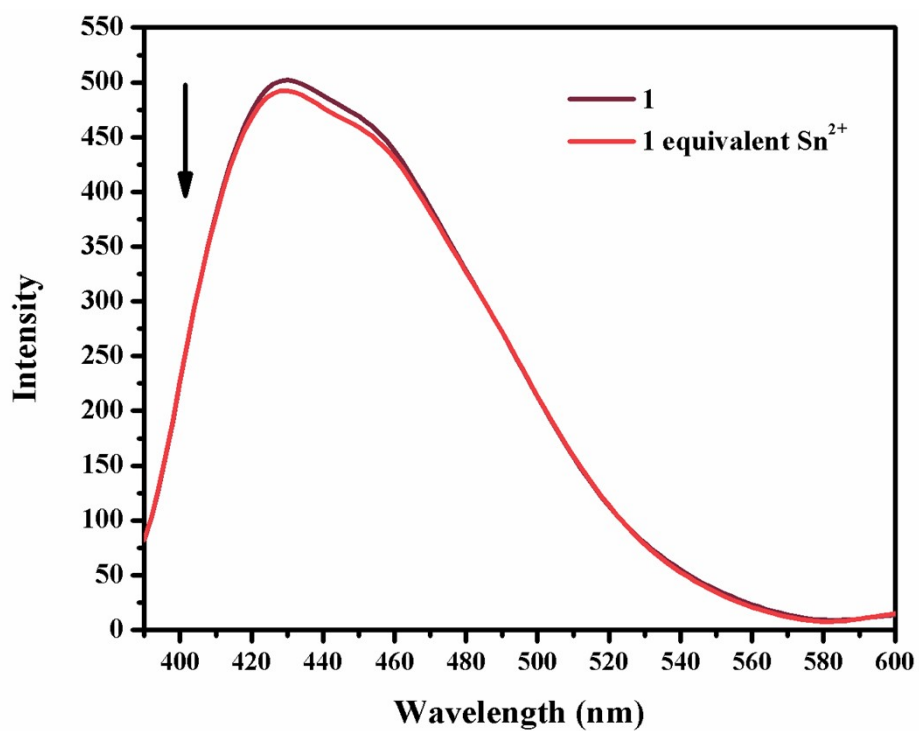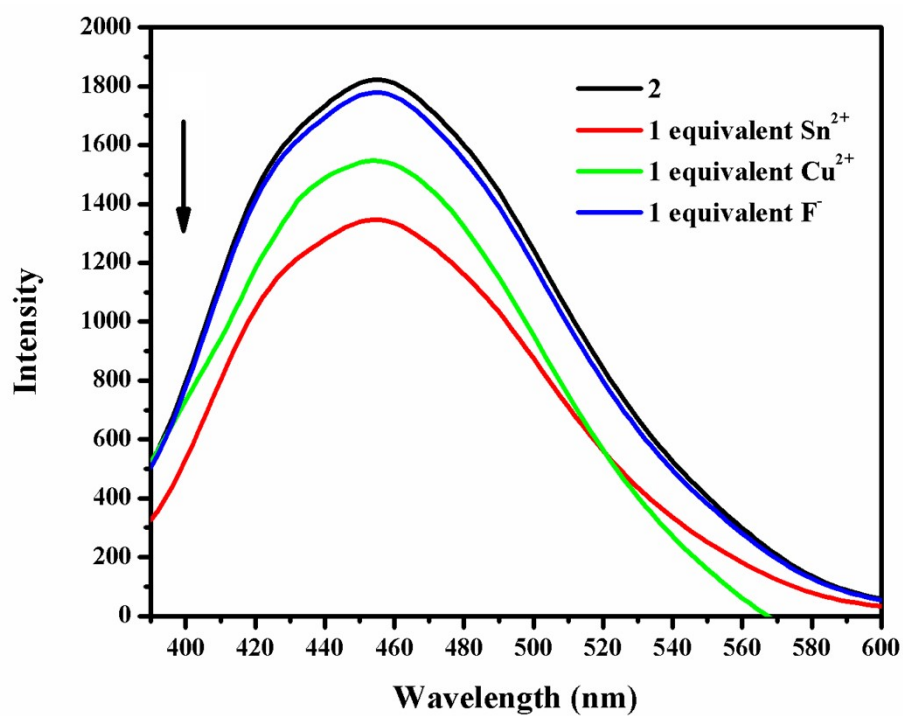

**Fig. S12** Fluorescence spectroscopy for receptor (1) with 1 equivalent Sn<sup>2+</sup> and receptor (2) with 1 equivalent Sn<sup>2+</sup>, Cu<sup>2+</sup> and F<sup>-</sup> ( $c = 10^{-5}$  M).

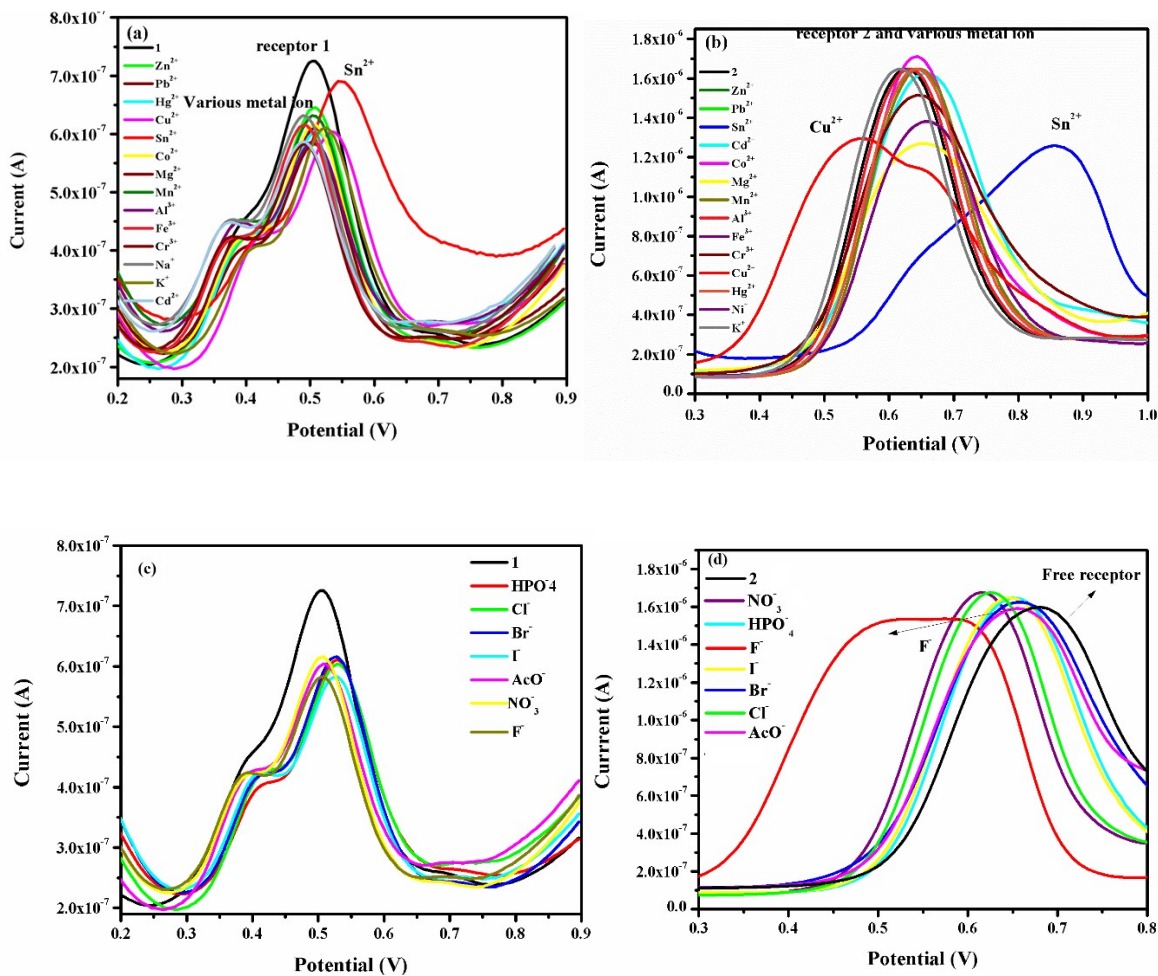

**Fig. S13** Differential pulse voltammogram for **(a)** receptor 1 with various metal ion and **(b)** receptor 2 with various metal ion **(c)** receptor 1 with various anion and **(d)** receptor 2 with various anion ( $c = 1 \times 10^{-3} \text{ M}$ )

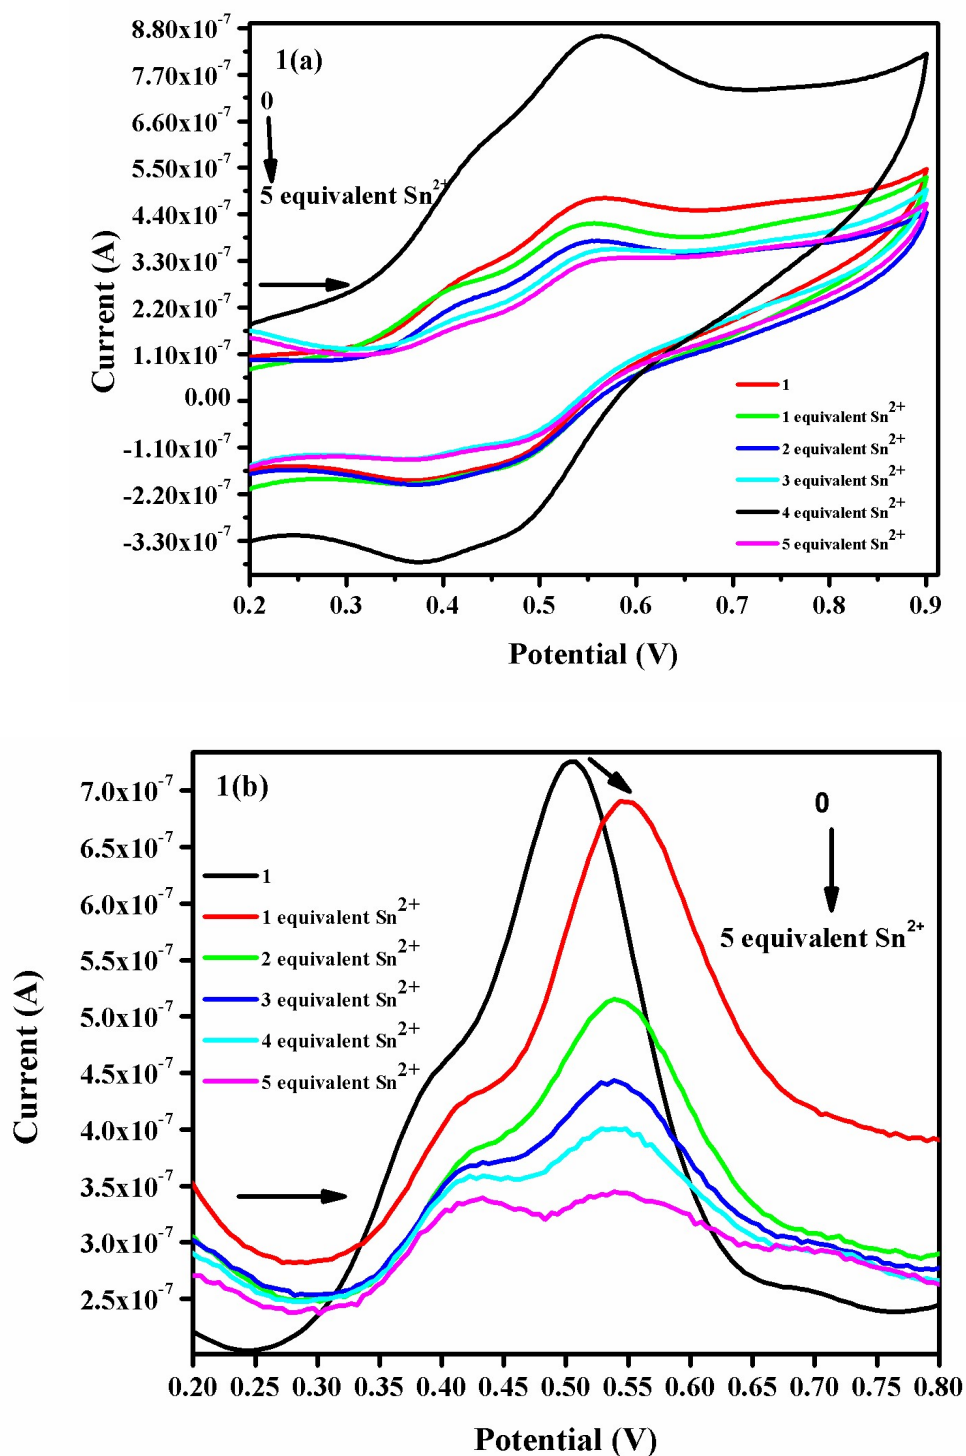

**Fig. S14** (a) CV and (b) DPV of receptor **1** (black line) in CH<sub>3</sub>CN ( $c = 1 \times 10^{-3}$  M) using 0.1 M [(n-Bu)<sub>4</sub>N] ClO<sub>4</sub> supporting electrolyte, by the sequential addition of 0 to 5.0 equivalent of Sn<sup>2+</sup> ion.

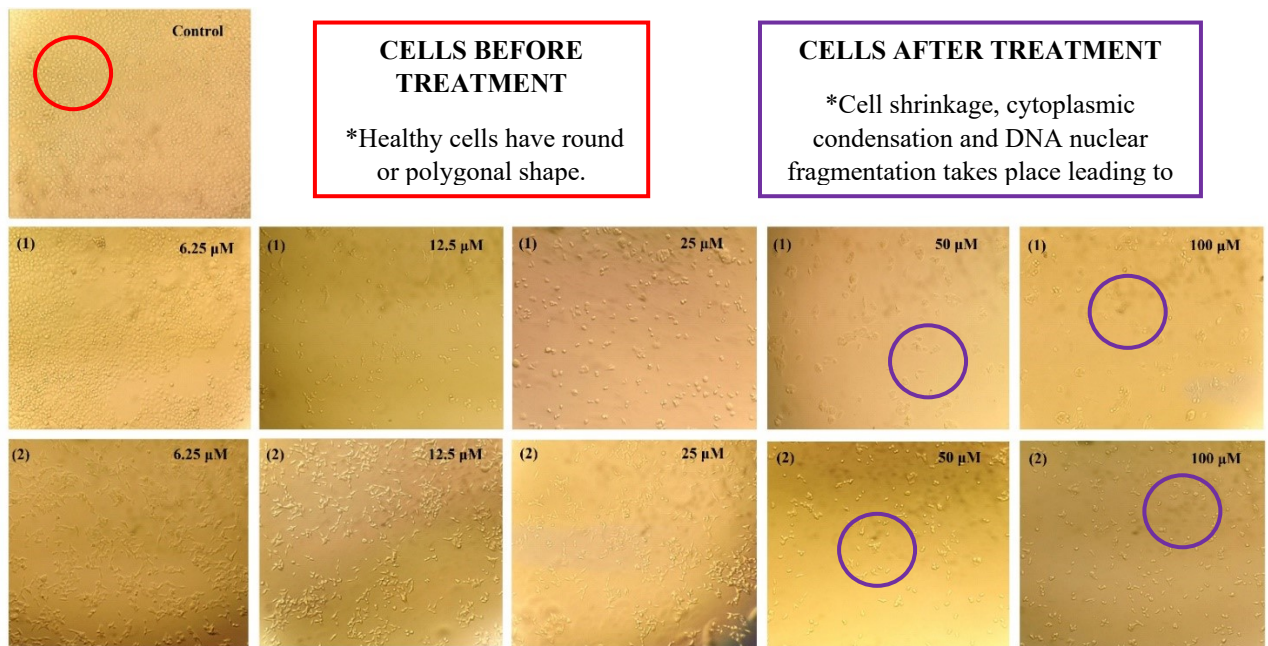

**Fig. S15** *In vitro* cytotoxicity morphologies of HepG2 for receptor (1) and (2)

**Table S1.** Selected bond length and bond angle for receptor **1**

| Bond length |     |       | Bond angle |     |     |        |
|-------------|-----|-------|------------|-----|-----|--------|
| C1          | C2  | 1.541 | C3         | C2  | C7  | 121.34 |
| C2          | C3  | 1.368 | C2         | C3  | C4  | 118.70 |
| C3          | C4  | 1.424 | N2         | C4  | C5  | 111.49 |
| C4          | N2  | 1.376 | N2         | C4  | C3  | 130.78 |
| C5          | N1  | 1.386 | N1         | C5  | C4  | 104.49 |
| C8          | N2  | 1.323 | C6         | C5  | C4  | 123.00 |
| C8          | N1  | 1.387 | N2         | C8  | N1  | 112.74 |
| C9          | C10 | 1.435 | N2         | C8  | C9  | 121.93 |
| C9          | Fe1 | 2.060 | N1         | C8  | C9  | 125.27 |
| C11         | Fe1 | 2.024 | C10        | C9  | C13 | 107.37 |
| C11         | C12 | 1.451 | C10        | C9  | C8  | 122.45 |
| C14         | C18 | 1.397 | C10        | C9  | Fe1 | 69.09  |
| Fe1         | C10 | 2.048 | C8         | C9  | Fe1 | 131.16 |
| Fe1         | C17 | 2.061 | C13        | C9  | Fe1 | 68.93  |
| N1          | C19 | 1.461 | C11        | C10 | C9  | 108.31 |
| C19         | C20 | 1.510 | C10        | C11 | Fe1 | 70.67  |
| Fe2         | C21 | 2.050 | N1         | C19 | C20 | 110.81 |
| C25         | C26 | 1.390 | C24        | C20 | C19 | 126.06 |
| C29         | C28 | 1.404 | C24        | C20 | Fe2 | 69.06  |
| Fe2         | C28 | 2.011 | C21        | C20 | C19 | 126.04 |



**Table S2.** Crystallographic data and structure refinement parameters of receptor **1**

| <b>Crystallographic data</b>                                                                      | <b>Receptor 1</b>                                                   |
|---------------------------------------------------------------------------------------------------|---------------------------------------------------------------------|
| Formula                                                                                           | C <sub>29</sub> H <sub>26</sub> Fe <sub>2</sub> N <sub>2</sub>      |
| Formula weight                                                                                    | 514.22                                                              |
| T/K                                                                                               | 304 K                                                               |
| Crystal system                                                                                    | Orthorhombic                                                        |
| Space group                                                                                       | P 2 <sub>1</sub> 2 <sub>1</sub> 2 <sub>1</sub>                      |
| Hall group                                                                                        | P 2ac, P 2ab                                                        |
| <i>a</i> /Å                                                                                       | 9.6083(4)                                                           |
| <i>b</i> /Å                                                                                       | 14.0301(6)                                                          |
| <i>c</i> /Å                                                                                       | 17.6821(9)                                                          |
| $\alpha$ /°                                                                                       | 90                                                                  |
| $\beta$ /°                                                                                        | 90                                                                  |
| $\gamma$ /°                                                                                       | 90                                                                  |
| V                                                                                                 | 2383.64 (19)                                                        |
| Z/ Wavelength                                                                                     | 4/0.71073                                                           |
| D <sub>x</sub> [g cm <sup>-3</sup> ]                                                              | 1.433                                                               |
| $\mu$ (Mo-K $\alpha$ ) mm <sup>-1</sup>                                                           | 1.237                                                               |
| <i>F</i> (000)                                                                                    | 1064.0                                                              |
| Index ranges                                                                                      | -11 ≤ <i>h</i> ≤ 11,<br>-16 ≤ <i>k</i> ≤ 16,<br>-21 ≤ <i>l</i> ≤ 21 |
| Reflections collected                                                                             | 4059                                                                |
| Unique reflections                                                                                | 299                                                                 |
| GOF                                                                                               | 1.013                                                               |
| $\theta$ (max)                                                                                    | 25.027                                                              |
| Data completeness                                                                                 | 1.61/0.91                                                           |
| <i>R</i> <sub>1</sub> , <i>wR</i> <sub>2</sub> [ <i>I</i> > 2 $\sigma$ ( <i>I</i> )] <sup>a</sup> | 0.0591(2262)                                                        |
| <i>R</i> <sub>1</sub> , <i>wR</i> <sub>2</sub> (all data) <sup>b</sup>                            | 0.1204(4059)                                                        |
| $\Delta\rho_{\min}$ , $\Delta\rho_{\max}$ (e Å <sup>-3</sup> )                                    | 0.262, 1.000                                                        |
| CCDC No.                                                                                          | 2124549                                                             |

<sup>a</sup> $R = \sum||F_o| - |F_c|| / \sum|F_o|$ ;  $wR_2 = \{\sum[w(F_o^2 - F_c^2)^2] / \sum[w(F_o^2)^2]\}^{1/2}$ . <sup>b</sup> $S = \{\sum[(F_o^2 - F_c^2)^2] / (n/p)\}^{1/2}$  where *n* is the number of reflections and *p* is the total number of parameters refined.

**Table S3.** Antimicrobial activity with zone of inhibition for the receptor (1) and (2)

| Sample code | Sample name | Test Bacteria                 | Zone of Inhibition (mm) |             |             |               |
|-------------|-------------|-------------------------------|-------------------------|-------------|-------------|---------------|
|             |             |                               | 10<br>µg/mL             | 20<br>µg/mL | 30<br>µg/mL | Standard Drug |
| 1a          | 1           | <i>E. coli</i> ATCC-23848     | 0                       | 19          | 30          | 31            |
| 1b          | 1           | <i>S. aureus</i> ATCC-25923   | 0                       | 20          | 31          | 32            |
| 1c          | 1           | <i>C. albicans</i> ATCC-10231 | 0                       | 0           | 32          | 29            |
| 2a          | 2           | <i>E. coli</i> ATCC-23848     | 0                       | 15          | 23          | 32            |
| 2b          | 2           | <i>S. aureus</i> ATCC-25923   | 0                       | 16          | 22          | 32            |
| 2c          | 2           | <i>C. albicans</i> ATCC-10231 | 0                       | 12          | 20          | 29            |

Standard drug: ampicillin, ciprofloxacin and fluconazole (30 µg/mL) for Gram-positive (1b, 2b), Gram-negative (1a, 2a) and fungi strains (1c, 2c) respectively
